# Supplementary material for: Characterizing the suckling behavior by video and 3D-accelerometry in humpback whale calves on a breeding ground
Source: PeerJ journal article supplement (doi:10.7717/peerj.12945), 2022-02-17

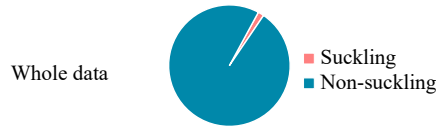

**FEATURES EXTRACTION**  
2 s sliding windows, no overlap

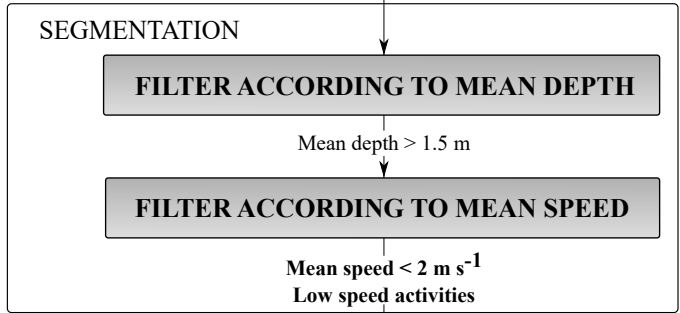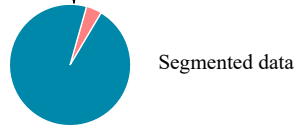

**SPLIT**  
Holdout or Leave-one-out

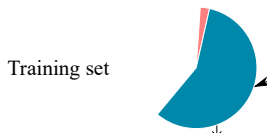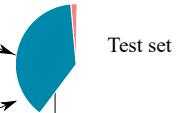

**BAYESIAN OPTIMIZATION**  
(5-fold crossvalidation, 100 iterations)

**TRAINING**

**PREDICTION**

**PERFORMANCE EVALUATION**

REPEAT

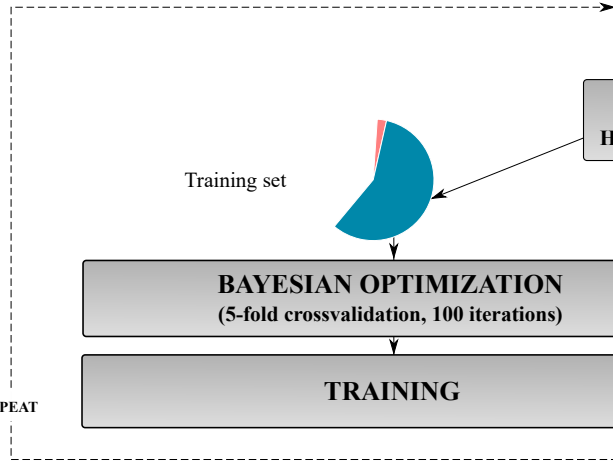

Supplement: Supplemental_Figure_S1.pdf [file Supplemental_Figure_S1.pdf]
