# Supplementary material for: Characterizing the suckling behavior by video and 3D-accelerometry in humpback whale calves on a breeding ground
Source: PeerJ journal article supplement (doi:10.7717/peerj.12945), 2022-02-17

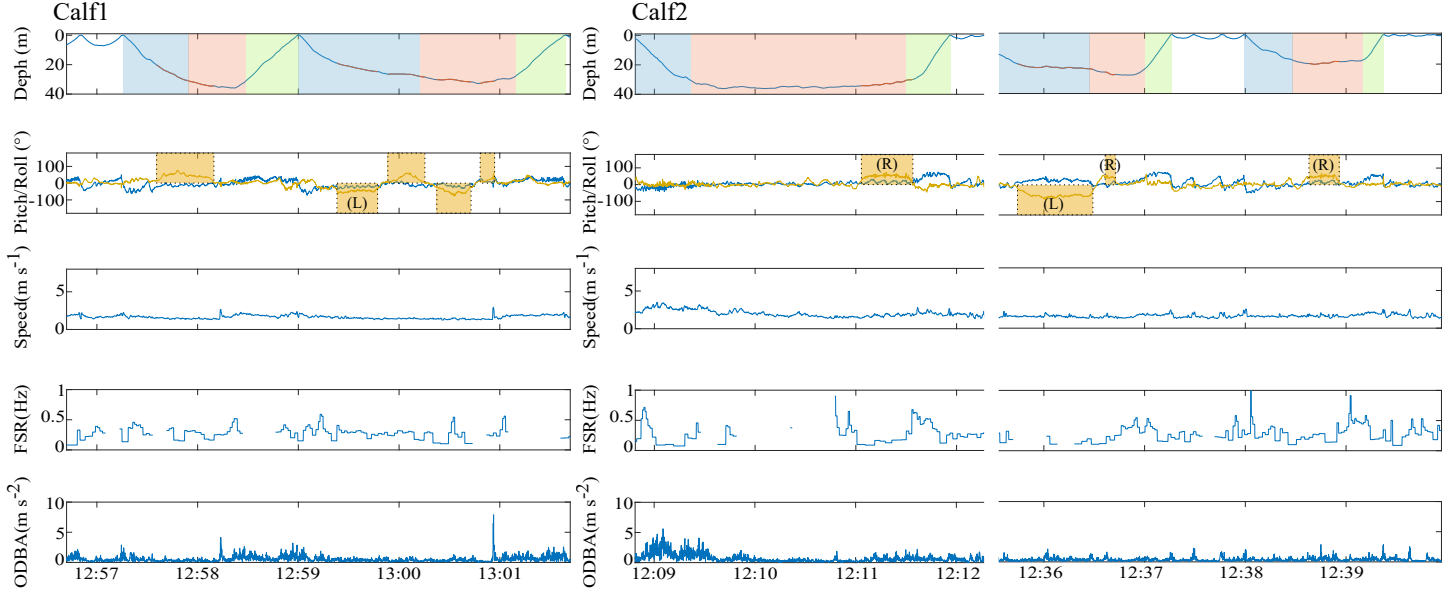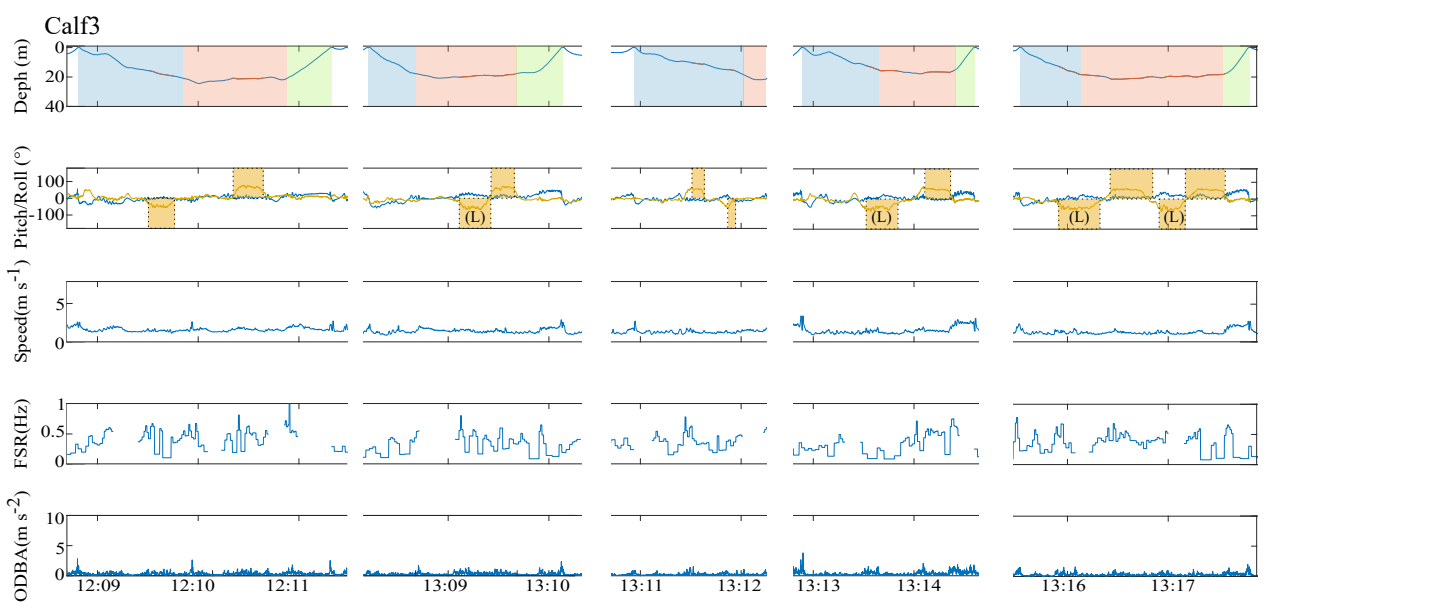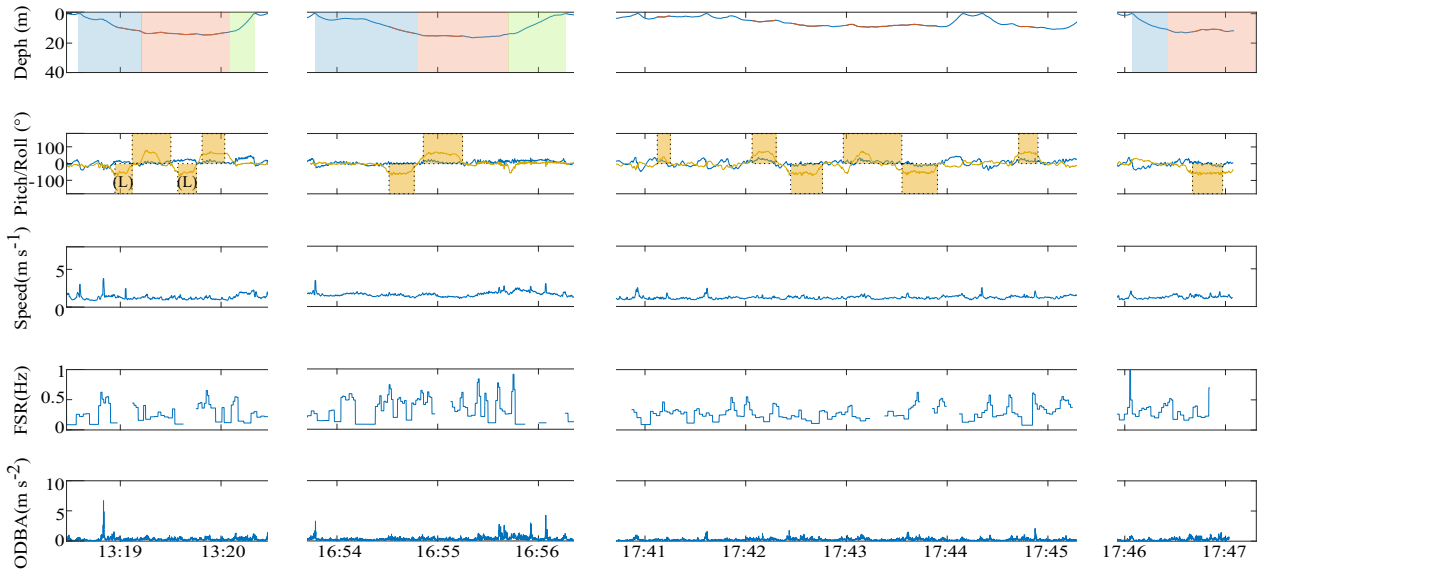

Supplement: Supplemental_Figure_S2.pdf [file Supplemental_Figure_S2.pdf]
